# Supplementary material
Source: MDPI journal article supplement (https://www.mdpi.com/2077-0472/11/4/277)

**Figure S2.** Mean values of monthly rainfall (prec), and mean (tmean), minimum (tmin) and maximum (tmax) temperature of the locations of the durum and rivet wheat accessions

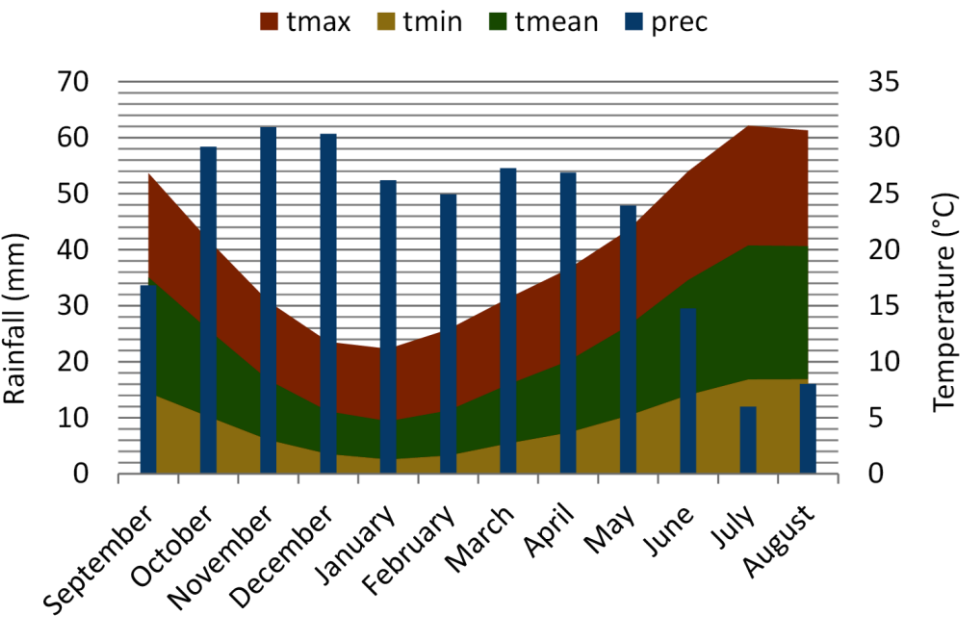

Supplement: s1 [file s1]
