# Supplementary material
Source: MDPI journal article supplement (https://www.mdpi.com/2077-0472/11/4/277)
Supplement: s1 [file s1]

**Table S1** Agronomic variables recorded in each accession

| Variable         | Class        |
|------------------|--------------|
| Growth habit     | Prostrate    |
|                  | Intermediate |
|                  | Erect        |
| Spike density    | Lax          |
|                  | Intermediate |
|                  | Dense        |
|                  | Very dense   |
| Glume hairiness  | Hairless     |
|                  | Low          |
|                  | High         |
| Seed colour      | White        |
|                  | Red          |
| Days to heading  | days         |
| Days to maturity | days         |
| Plant height     | cm           |

**Table S2** Ecogeographic variables considered in the characterization of the durum wheat accessions obtained from various sources compiled by CAPFITOGEN [36]

| Ecogeographic component | Description                                                       | Abbreviation           | Unit     |
|-------------------------|-------------------------------------------------------------------|------------------------|----------|
| Bioclimatic             | Monthly precipitation (January to June)                           | prec_1 to 12           | mm       |
|                         | Monthly mean temperature (January to June)                        | tmean_1 to 12          | °C       |
|                         | Monthly minimum temperature (January to June)                     | tmin_1 to 12           | °C       |
|                         | Monthly maximum temperature (January to June)                     | tmax_1 to 12           | °C       |
|                         | Annual mean temperature                                           | bio_1                  | °C       |
|                         | Mean daily temperature range (Mean monthly (max temp - min temp)) | bio_2                  | °C       |
|                         | Isothermality (bio_2/bio_7) (* 100)                               | bio_3                  | -        |
|                         | Temperature seasonality (standard deviation *100)                 | bio_4                  | -        |
|                         | Maximum temperature of hottest month                              | bio_5                  | °C       |
|                         | Minimum temperature of coldest month                              | bio_6                  | °C       |
|                         | Annual temperature range (BIO5-BIO6)                              | bio_7                  | °C       |
|                         | Mean temperature of wettest quarter                               | bio_8                  | °C       |
|                         | Mean temperature of driest quarter                                | bio_9                  | °C       |
|                         | Mean temperature of of hottest quarter                            | bio_10                 | °C       |
|                         | Mean temperature of coldest quarter                               | bio_11                 | °C       |
|                         | Annual precipitation                                              | bio_12                 | mm       |
|                         | Precipitation of wettest month                                    | bio_13                 | mm       |
|                         | Precipitation of driest month                                     | bio_14                 | mm       |
|                         | Precipitation seasonality (Coefficient of variation)              | bio_15                 | mm       |
| Geophysic               | Precipitation of wettest quarter                                  | bio_16                 | mm       |
|                         | Precipitation of driest quarter                                   | bio_17                 | mm       |
|                         | Precipitation of hottest quarter                                  | bio_18                 | mm       |
|                         | Precipitation of coldest quarter                                  | bio_19                 | mm       |
| Geophysic               | Northness (1 if it faces northwards, - 1 if it faces southwards)  | northness              | °        |
|                         | Eastness (1 if it faces eastwards, - 1 if it faces westwards)     | eastness               | °        |
|                         | Altitude                                                          | Meters above sea level | m        |
| Edaphic                 | Topsoil clay fraction                                             | t_clay                 | % weight |
|                         | Topsoil sand fraction                                             | t_sand                 | % weight |
|                         | Subsoil clay content                                              | s_clay                 | % weight |
|                         | Topsoil pH (H2O)                                                  | t_pH                   | -log(H+) |
|                         | Topsoil reference bulk density                                    | t_ref_bulk             | % weight |

**Table S4.** Means of the ecogeographic variables (see Table S2) ordered according to their significant differences ( $p < 0.05$ ) between resistant and susceptible accessions at the seedling stage for durum and rivet wheat and the durum wheat isolates CDJ13 and JD15.

|       | Variable | Resistant | Susceptible |       | Variable     | Resistant | Susceptible |
|-------|----------|-----------|-------------|-------|--------------|-----------|-------------|
| CDJ13 | bio_3    | 39.81     | 38.06       | JDJ15 | bio_4        | 517.84    | 604.29      |
|       |          |           |             |       | bio_7 (°C)   | 24.74     | 28.65       |
|       |          |           |             |       | prec_10 (mm) | 72.82     | 57.09       |
|       |          |           |             |       | prec_11 (mm) | 84.98     | 58.08       |
|       |          |           |             |       | bio_13 (mm)  | 90.36     | 67.58       |
|       |          |           |             |       | bio_16 (mm)  | 240.66    | 183.34      |
|       |          |           |             |       | prec_12 (mm) | 77.77     | 56.08       |
|       |          |           |             |       | bio_12 (mm)  | 666.87    | 515.08      |
|       |          |           |             |       | bio_2 (°C)   | 9.81      | 11.02       |
|       |          |           |             |       | prec_1 (mm)  | 66.89     | 48.38       |
|       |          |           |             |       | tmax_7 (°C)  | 28.14     | 31.1        |
|       |          |           |             |       | bio_19 (mm)  | 205.9     | 151.7       |
|       |          |           |             |       | bio_5 (°C)   | 28.34     | 31.14       |
|       |          |           |             |       | tmax_8 (°C)  | 28.15     | 30.67       |
|       |          |           |             |       | tmean_7 (°C) | 22.09     | 23.99       |
|       |          |           |             |       | prec_2 (mm)  | 61.23     | 47.24       |

CDJ13 = Conil Don Jaime 13, JDJ15 = Jerez Don José 15

**Table S5.** The top 30 bioclimatic variables (see Table S2) selected according to the mean decrease accuracy of the random forest approach for durum and rivet wheat within each durum wheat isolate at seedling stage

| CDJ13 |          |                        | JDJ15    |                        |  |
|-------|----------|------------------------|----------|------------------------|--|
| Rank  | Variable | Mean Decrease Accuracy | Variable | Mean Decrease Accuracy |  |
| 1     | bio_7    | 5.30233067             | tmax_2   | 4.45490475             |  |
| 2     | tmax_4   | 5.17994035             | tmean_6  | 4.16368382             |  |
| 3     | tmax_3   | 5.03425128             | tmin_10  | 3.48247218             |  |
| 4     | tmax_2   | 4.38994382             | bio_7    | 3.39956819             |  |
| 5     | tmin_2   | 4.15461625             | bio_4    | 3.30975429             |  |
| 6     | tmean_12 | 3.92759112             | tmean_12 | 3.23338353             |  |
| 7     | bio_6    | 3.76139364             | bio_9    | 3.04426391             |  |
| 8     | tmean_7  | 3.69923181             | tmean_7  | 2.87114511             |  |
| 9     | tmax_11  | 3.56377142             | bio_6    | 2.72896835             |  |
| 10    | prec_5   | 3.54596173             | tmin_11  | 2.72046668             |  |
| 10    | tmin_11  | 3.53319868             | tmax_3   | 2.58608051             |  |
| 12    | bio_3    | 3.45237053             | bio_11   | 2.56613457             |  |
| 13    | bio_1    | 3.44873951             | bio_14   | 2.53392420             |  |
| 14    | bio_10   | 3.40607393             | bio_10   | 2.50170070             |  |
| 15    | tmean_9  | 3.40515664             | tmax_1   | 2.46955699             |  |
| 16    | tmin_3   | 3.34486632             | tmean_2  | 2.42023781             |  |
| 17    | tmean_1  | 3.07005245             | tmean_9  | 2.37305829             |  |
| 18    | tmin_5   | 3.0636663              | tmean_10 | 2.24040721             |  |
| 19    | tmean_6  | 3.01543877             | tmax_12  | 2.17069374             |  |
| 20    | tmean_3  | 2.94806925             | tmin_12  | 2.15754949             |  |
| 21    | tmean_2  | 2.87234877             | prec_8   | 2.09719666             |  |
| 22    | tmin_4   | 2.84632914             | bio_3    | 1.96370300             |  |
| 23    | tmax_9   | 2.78232624             | tmean_1  | 1.87249886             |  |
| 24    | tmean_11 | 2.74680487             | tmin_1   | 1.71945734             |  |
| 25    | tmax_8   | 2.64620401             | tmax_11  | 1.71006941             |  |
| 26    | tmax_10  | 2.56995017             | tmin_2   | 1.70218733             |  |
| 27    | prec_10  | 2.5347136              | tmean_4  | 1.70043699             |  |
| 28    | tmean_10 | 2.51797508             | prec_11  | 1.69398532             |  |
| 29    | tmax_7   | 2.47562172             | tmin_7   | 1.66690528             |  |
| 30    | tmean_4  | 2.41897386             | tmax_4   | 1.62293943             |  |

CDJ13 = Conil Don Jaime 13, JDJ15 = Jerez Don José 15

**Table S7.** Means of the ecogeographic variables (see Table S2) ordered according to their significant differences ( $p < 0.05$ ) between resistant and susceptible accessions based on their Severity values at adult stage in field plots for durum and rivet wheat.

| Ecogeographic variable | Resistant | Susceptible |
|------------------------|-----------|-------------|
| bio_7 (°C)             | 24.77     | 28.86       |
| bio_2 (°C)             | 9.94      | 11.12       |
| prec_10 (mm)           | 71.07     | 57.46       |
| bio_3                  | 39.9      | 38.1        |

**Table S9** Pearson's correlation ( $p < 0.05$ ) between uredinium size (U<sub>r</sub>S) and ecogeographic variables (see Table S2) in the tetraploid accessions (n = 40) evaluated for partial disease resistance to the CDJ13 isolate at seedling stage

| variable         | variable | r value | p-value |
|------------------|----------|---------|---------|
| U <sub>r</sub> S | bio_1    | 0.31    | 0.049   |
|                  | tmean_4  | 0.33    | 0.040   |
|                  | tmean_5  | 0.33    | 0.040   |
|                  | tmean_6  | 0.32    | 0.043   |
|                  | tmean_9  | 0.32    | 0.045   |
|                  | tmax_4   | 0.32    | 0.047   |
|                  | tmax_5   | 0.32    | 0.046   |
|                  | tmin_3   | 0.32    | 0.046   |
|                  | tmin_4   | 0.32    | 0.044   |
|                  | tmin_5   | 0.31    | 0.049   |
|                  | tmin_6   | 0.32    | 0.047   |
|                  | tmin_9   | 0.32    | 0.041   |
|                  | tmin_10  | 0.32    | 0.044   |
|                  | tmin_11  | 0.32    | 0.045   |

CDJ13 = Conil Don Jaime 13

**Table S10** Mean values and standard deviations for each subspecies of the most relevant ecogeographic variables (see Table S2) significantly different between resistant and susceptible groups

| Variable     | Subspecies               | n  | Mean   | S.D.  |
|--------------|--------------------------|----|--------|-------|
| bio_2 (°C)   | domesticated emmer wheat | 10 | 10.34  | 1.04  |
|              | rivet                    | 18 | 10.48  | 1.53  |
|              | durum                    | 56 | 11.22  | 1.05  |
| bio_3        | domesticated emmer wheat | 10 | 40.60  | 2.01  |
|              | rivet                    | 18 | 39.31  | 2.51  |
|              | durum                    | 56 | 37.88  | 1.51  |
| bio_4        | domesticated emmer wheat | 10 | 516.07 | 87.84 |
|              | rivet                    | 18 | 553.79 | 88.6  |
|              | durum                    | 56 | 615.98 | 51.16 |
| bio_7 (°C)   | domesticated emmer wheat | 10 | 25.28  | 3.62  |
|              | rivet                    | 18 | 26.46  | 4.07  |
|              | durum                    | 56 | 29.27  | 2.61  |
| prec_10 (mm) | domesticated emmer wheat | 10 | 78.35  | 19.55 |
|              | rivet                    | 18 | 63.09  | 17.96 |
|              | durum                    | 56 | 56.87  | 12.65 |
| prec_11 (mm) | domesticated emmer wheat | 10 | 97.43  | 34.43 |
|              | rivet                    | 18 | 66.53  | 30.47 |
|              | durum                    | 56 | 60.4   | 20.85 |

Eliminado: domesticated emmer

Eliminado: domesticated emmer
