# Supplementary material
Source: MDPI journal article supplement (https://www.mdpi.com/2077-0472/11/4/277)
Supplement: s1 [file s1]

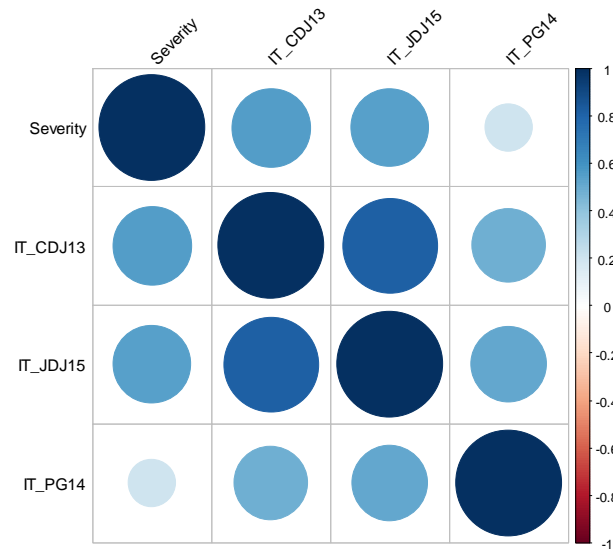

**Figure S1.** Pearson correlations between disease Severity in the field and the disease parameters infection type (IT) assessed for each isolate Conil Don Jaime 13 (CDJ13), Jerez Don José 15 (JDJ15) and Peralta García 14 (PG14). Coefficients  $> |0.2|$  are significant ( $p < 0.05$ )
